# Supplementary material
Source: PubMed Central journal article supplement (PMC7709909)
Supplement: NIHMS1643573-supplement-Supplement.pdf [file NIHMS1643573-supplement-Supplement.pdf]

**Effects of Biomass Burning on Stratocumulus Droplet Characteristics, Drizzle Rate, and Composition**

Ali Hossein Mardi<sup>1</sup>, Hossein Dadashazar<sup>1</sup>, Alexander B. MacDonald<sup>1</sup>, Ewan Crosbie<sup>2,3</sup>, Matthew M. Coggon<sup>4</sup>, Mojtaba Azadi Aghdam<sup>1</sup>, Roy K. Woods<sup>5</sup>, Hafliði H. Jonsson<sup>5</sup>, Richard C. Flagan<sup>6</sup>, John H. Seinfeld<sup>6</sup>, Armin Sorooshian<sup>1,7\*</sup>

<sup>1</sup>Department of Chemical and Environmental Engineering, University of Arizona, Tucson, AZ, USA

<sup>2</sup>Science Systems and Applications, Inc., Hampton, VA, USA

<sup>3</sup>NASA Langley Research Center, Hampton, VA, USA

<sup>4</sup>Cooperative Institute for Research in Environmental Science and National Oceanic and Atmospheric Administration, Boulder, CO, USA

<sup>5</sup>Naval Postgraduate School, Monterey, CA, USA

<sup>6</sup>Department of Chemical Engineering, California Institute of Technology, Pasadena, CA, USA

<sup>7</sup>Department of Hydrology and Atmospheric Sciences, University of Arizona, Tucson, AZ, USA

\*Corresponding author phone: 520-626-5858, email: armin@email.arizona.edu, address: PO BOX 210011, Tucson, AZ 85721

**Contents of this file**

Tables S1-S4 and Figures S1-S3.

## **Introduction**

The supporting information includes four tables, three figures, and additional references to complement the main manuscript file.

**Table S1.** Limits of detection of species measured by IC and ICP techniques for cloud water samples.

| IC Ions         | Limit of Detection (ppm) | ICP Elements | Limit of Detection (ppt) |
|-----------------|--------------------------|--------------|--------------------------|
| Cl              | 0.002                    | Al           | 29.47                    |
| Na              | 0.043                    | K            | 10.48                    |
| SO <sub>4</sub> | 0.012                    | Fe           | 1.19                     |
| NO <sub>3</sub> | 0.009                    | P            | 770.73                   |
| MSA             | 0.012                    | Zn           | 5.88                     |
| Ca              | 0.045                    | Mn           | 1.62                     |
| NO <sub>2</sub> | 0.026                    | Sr           | 1.10                     |
| NH <sub>4</sub> | 0.042                    | Se           | 82.39                    |
| Mg              | 0.037                    | Pb           | 0.503                    |
| Oxalate         | 0.012                    | Ni           | 2.84                     |
| Adipate         | 0.023                    | Cr           | 1.15                     |
| Acetate         | 0.003                    | Ba           | 3.70                     |
| Formate         | 0.074                    | Cu           | 1.13                     |
| Glycolate       | 0.054                    | Cd           | 4.19                     |
| Maleate         | 0.007                    | Sn           | 1.77                     |
| Succinate       | 0.011                    | Ti           | 39.05                    |
| Pyruvate        | 0.064                    | As           | 7.95                     |
| DMA             | 0.053                    | Mo           | 2.26                     |
|                 |                          | Co           | 0.72                     |
|                 |                          | V            | 1.35                     |
|                 |                          | Rb           | 1.57                     |
|                 |                          | Y            | 0.52                     |
|                 |                          | Zr           | 1.01                     |
|                 |                          | Ag           | 0.74                     |
|                 |                          | Cs           | 0.73                     |
|                 |                          | Nb           | 0.52                     |
|                 |                          | Si           | 126.47                   |
|                 |                          | Hf           | 0.96                     |

**Table S2.** Average concentration of measured species in cloud water samples during the NiCE campaign. IC species are shown from Cl to dimethylamine (DMA), while IPC elements range from Al to the bottom of the list. N/A in concentration columns indicates no measurement above the limit of detection. N/A in the concentration increase column is placed whenever the percent increase from zero could not be measured.

| Species         | Average Concentration ( $\mu\text{g m}^{-3}$ ) |          | Average Mass Fraction |          | Concentration Increase   |             |
|-----------------|------------------------------------------------|----------|-----------------------|----------|--------------------------|-------------|
|                 | Non-BB                                         | BB       | Non-BB                | BB       | ( $\mu\text{g m}^{-3}$ ) | Percent (%) |
| Cl              | 2.66E-01                                       | 1.50E+01 | 2.22E-01              | 4.75E-01 | 1.48E+01                 | 5.54E+03    |
| Na              | 1.55E-01                                       | 8.64E+00 | 1.29E-01              | 2.74E-01 | 8.49E+00                 | 5.46E+03    |
| SO <sub>4</sub> | 2.53E-01                                       | 4.63E-01 | 2.07E-01              | 2.08E-02 | 2.10E-01                 | 8.28E+01    |
| NO <sub>3</sub> | 2.94E-01                                       | 2.81E+00 | 2.28E-01              | 9.89E-02 | 2.52E+00                 | 8.55E+02    |
| MSA             | 3.44E-02                                       | 3.24E-01 | 2.93E-02              | 1.19E-02 | 2.90E-01                 | 8.42E+02    |
| Ca              | 3.15E-02                                       | 1.40E-01 | 3.00E-02              | 3.25E-03 | 1.08E-01                 | 3.44E+02    |
| NO <sub>2</sub> | 3.25E-02                                       | 5.04E-02 | 2.59E-02              | 2.39E-03 | 1.79E-02                 | 5.50E+01    |
| NH <sub>4</sub> | 2.91E-02                                       | 3.17E-01 | 2.54E-02              | 1.33E-02 | 2.88E-01                 | 9.89E+02    |
| Mg              | 1.48E-03                                       | 1.44E-02 | 1.67E-03              | 2.95E-04 | 1.29E-02                 | 8.69E+02    |
| Oxalate         | 2.20E-02                                       | 5.97E-01 | 1.86E-02              | 2.23E-02 | 5.75E-01                 | 2.61E+03    |
| Adipate         | 1.17E-03                                       | 1.26E-01 | 7.90E-04              | 4.63E-03 | 1.25E-01                 | 1.06E+04    |
| Acetate         | 1.48E-02                                       | 3.35E-01 | 1.13E-02              | 1.47E-02 | 3.20E-01                 | 2.16E+03    |
| Formate         | 2.43E-02                                       | 2.99E-01 | 1.98E-02              | 1.42E-02 | 2.74E-01                 | 1.13E+03    |
| Glycolate       | 2.90E-04                                       | 1.46E-01 | 2.52E-04              | 5.23E-03 | 1.46E-01                 | 5.02E+04    |
| Maleate         | 3.60E-03                                       | 8.15E-02 | 2.95E-03              | 3.11E-03 | 7.79E-02                 | 2.17E+03    |
| Succinate       | 3.51E-03                                       | 8.57E-02 | 2.59E-03              | 3.93E-03 | 8.22E-02                 | 2.34E+03    |
| Pyruvate        | N/A                                            | 6.23E-03 | N/A                   | 2.51E-04 | 1.25E-02                 | N/A         |
| DMA             | N/A                                            | 2.64E-02 | N/A                   | 9.63E-04 | 3.02E-02                 | N/A         |
| Al              | 1.56E-03                                       | 1.62E-02 | 1.19E-03              | 5.16E-04 | 1.46E-02                 | 9.36E+02    |
| K               | 2.46E-03                                       | 5.88E-02 | 2.48E-03              | 1.77E-03 | 5.63E-02                 | 2.29E+03    |
| Fe              | 2.36E-03                                       | 1.28E-02 | 1.71E-03              | 4.34E-04 | 1.04E-02                 | 4.42E+02    |
| I               | 6.20E-03                                       | 1.42E-02 | 5.10E-03              | 5.72E-04 | 8.03E-03                 | 1.30E+02    |
| Zn              | 2.58E-03                                       | 2.47E-03 | 2.12E-03              | 9.29E-05 | -1.07E-04                | -4.14E+00   |
| Mn              | 9.22E-04                                       | 1.07E-02 | 6.74E-04              | 2.85E-04 | 9.79E-03                 | 1.06E+03    |
| Sr              | 2.69E-04                                       | 8.24E-03 | 2.07E-04              | 2.53E-04 | 7.98E-03                 | 2.97E+03    |
| Se              | 1.43E-04                                       | 7.84E-04 | 1.19E-04              | 2.92E-05 | 6.41E-04                 | 4.48E+02    |
| Pb              | 2.21E-05                                       | 1.48E-04 | 1.62E-05              | 4.93E-06 | 1.26E-04                 | 5.69E+02    |
| Ni              | 1.75E-04                                       | 3.14E-04 | 1.42E-04              | 1.11E-05 | 1.39E-04                 | 7.97E+01    |
| Cr              | 4.89E-05                                       | 1.22E-04 | 3.72E-05              | 4.14E-06 | 7.28E-05                 | 1.49E+02    |
| Ba              | 2.83E-04                                       | 3.07E-03 | 2.17E-04              | 8.46E-05 | 2.78E-03                 | 9.84E+02    |
| Cu              | 3.15E-03                                       | 1.51E-03 | 2.50E-03              | 5.86E-05 | -1.64E-03                | -5.20E+01   |
| Cd              | 6.66E-03                                       | 2.18E-03 | 5.83E-03              | 9.38E-05 | -4.47E-03                | -6.72E+01   |
| Sn              | 1.76E-05                                       | 1.64E-05 | 1.44E-05              | 6.75E-07 | -1.16E-06                | -6.60E+00   |
| Ti              | 2.40E-05                                       | 2.42E-04 | 1.84E-05              | 1.12E-05 | 2.18E-04                 | 9.10E+02    |
| As              | 1.81E-05                                       | 1.06E-04 | 1.50E-05              | 3.83E-06 | 8.81E-05                 | 4.87E+02    |
| Mo              | 9.91E-06                                       | 2.05E-05 | 7.20E-06              | 7.24E-07 | 1.06E-05                 | 1.07E+02    |
| Co              | 1.00E-05                                       | 3.64E-05 | 8.41E-06              | 1.17E-06 | 2.64E-05                 | 2.64E+02    |
| V               | 2.10E-04                                       | 5.77E-04 | 1.64E-04              | 2.07E-05 | 3.67E-04                 | 1.75E+02    |
| Rb              | 9.91E-06                                       | 1.22E-04 | 8.40E-06              | 3.82E-06 | 1.12E-04                 | 1.13E+03    |
| Y               | N/A                                            | 1.41E-05 | N/A                   | 4.54E-07 | 1.61E-05                 | N/A         |
| Zr              | 4.13E-06                                       | 1.90E-05 | 3.39E-06              | 6.62E-07 | 1.49E-05                 | 3.60E+02    |
| Si              | 1.27E-02                                       | 3.00E-02 | 9.45E-03              | 1.02E-03 | 1.74E-02                 | 1.37E+02    |

**Table S3.** Same as Table S2 except for the FASE campaign.

| Species         | Average Concentration ( $\mu\text{g m}^{-3}$ ) |          | Average Mass Fraction |          | Concentration Increase   |             |
|-----------------|------------------------------------------------|----------|-----------------------|----------|--------------------------|-------------|
|                 | Non-BB                                         | BB       | Non-BB                | BB       | ( $\mu\text{g m}^{-3}$ ) | Percent (%) |
| Cl              | 8.49E-01                                       | 2.64E+00 | 1.37E-01              | 4.52E-01 | 1.79E+00                 | 2.11E+02    |
| Na              | 4.77E-01                                       | 1.53E+00 | 7.72E-02              | 2.57E-01 | 1.06E+00                 | 2.22E+02    |
| SO <sub>4</sub> | 2.45E-01                                       | 8.18E-01 | 7.41E-02              | 1.51E-01 | 5.73E-01                 | 2.34E+02    |
| NO <sub>3</sub> | 5.49E-02                                       | 2.61E+00 | 2.72E-01              | 4.13E-02 | 2.55E+00                 | 4.65E+03    |
| MSA             | 3.84E-02                                       | 1.25E-01 | 1.55E-02              | 2.39E-02 | 8.64E-02                 | 2.25E+02    |
| Ca              | 1.11E-02                                       | 2.06E+00 | 2.38E-01              | 9.09E-03 | 2.04E+00                 | 1.84E+04    |
| NO <sub>2</sub> | 1.10E-02                                       | 2.95E-02 | 2.38E-03              | 7.63E-03 | 1.85E-02                 | 1.68E+02    |
| NH <sub>4</sub> | 7.23E-03                                       | 2.45E-01 | 2.59E-02              | 3.93E-03 | 2.37E-01                 | 3.28E+03    |
| Mg              | 4.24E-03                                       | 1.31E-01 | 1.47E-02              | 2.49E-03 | 1.27E-01                 | 3.00E+03    |
| Oxalate         | 1.31E-02                                       | 5.15E-02 | 3.16E-03              | 5.74E-03 | 3.85E-02                 | 2.95E+02    |
| Adipate         | 7.07E-03                                       | 2.04E-02 | 2.00E-03              | 5.97E-03 | 1.33E-02                 | 1.88E+02    |
| Acetate         | 6.68E-03                                       | 2.63E-02 | 3.05E-03              | 4.14E-03 | 1.96E-02                 | 2.94E+02    |
| Formate         | 3.58E-03                                       | 1.92E-02 | 1.61E-03              | 2.23E-03 | 1.56E-02                 | 4.37E+02    |
| Glycolate       | 3.46E-03                                       | 5.22E-02 | 4.99E-03              | 2.04E-03 | 4.88E-02                 | 1.41E+03    |
| Maleate         | 2.88E-03                                       | 3.51E-02 | 3.53E-03              | 1.62E-03 | 3.22E-02                 | 1.12E+03    |
| Succinate       | 6.57E-05                                       | 5.59E-03 | 6.14E-04              | 5.75E-05 | 5.53E-03                 | 8.41E+03    |
| Al              | 2.06E-02                                       | 1.76E-01 | 1.70E-02              | 1.60E-02 | 1.55E-01                 | 7.54E+02    |
| K               | N/A                                            | 1.81E-01 | N/A                   | 1.66E-02 | 1.81E-01                 | N/A         |
| Fe              | 4.85E-03                                       | 9.66E-02 | 9.30E-03              | 3.44E-03 | 9.18E-02                 | 1.89E+03    |
| P               | 3.96E-03                                       | 1.14E-01 | 1.04E-02              | 3.11E-03 | 1.10E-01                 | 2.77E+03    |
| I               | 1.36E-03                                       | 7.32E-03 | 9.77E-04              | 9.53E-04 | 5.96E-03                 | 4.38E+02    |
| Zn              | 6.23E-04                                       | 3.49E-03 | 3.81E-04              | 5.31E-04 | 2.86E-03                 | 4.59E+02    |
| Mn              | 4.98E-04                                       | 2.00E-02 | 2.10E-03              | 3.54E-04 | 1.95E-02                 | 3.92E+03    |
| Sr              | 4.46E-04                                       | 2.86E-02 | 3.02E-03              | 2.63E-04 | 2.82E-02                 | 6.32E+03    |
| Se              | 2.10E-04                                       | 2.34E-04 | 2.23E-05              | 1.33E-04 | 2.43E-05                 | 1.16E+01    |
| Pb              | 2.00E-04                                       | 3.77E-04 | 3.65E-05              | 1.53E-04 | 1.77E-04                 | 8.87E+01    |
| Ni              | 1.84E-04                                       | 3.82E-03 | 5.38E-04              | 1.74E-04 | 3.64E-03                 | 1.98E+03    |
| Cr              | 1.62E-04                                       | 1.51E-03 | 1.95E-04              | 1.31E-04 | 1.35E-03                 | 8.32E+02    |
| Ba              | 1.54E-04                                       | 1.75E-02 | 1.96E-03              | 1.21E-04 | 1.73E-02                 | 1.13E+04    |
| Cu              | 1.34E-04                                       | 1.32E-03 | 1.49E-04              | 1.17E-04 | 1.19E-03                 | 8.86E+02    |
| Cd              | 1.05E-04                                       | 2.15E-04 | 3.16E-05              | 9.56E-05 | 1.09E-04                 | 1.04E+02    |
| Sn              | 1.00E-04                                       | 7.90E-05 | 9.68E-06              | 7.25E-05 | -2.14E-05                | -2.13E+01   |
| Ti              | 9.88E-05                                       | 3.01E-03 | 2.97E-04              | 6.08E-05 | 2.91E-03                 | 2.94E+03    |
| As              | 2.45E-05                                       | 1.08E-04 | 9.83E-06              | 1.75E-05 | 8.38E-05                 | 3.43E+02    |
| Mo              | 2.38E-05                                       | 3.17E-04 | 3.11E-05              | 2.23E-05 | 2.93E-04                 | 1.23E+03    |
| Co              | 2.35E-05                                       | 1.73E-04 | 1.83E-05              | 1.98E-05 | 1.49E-04                 | 6.36E+02    |
| V               | 1.91E-05                                       | 4.90E-04 | 4.79E-05              | 1.22E-05 | 4.71E-04                 | 2.46E+03    |
| Rb              | 1.27E-05                                       | 4.43E-04 | 4.25E-05              | 7.93E-06 | 4.30E-04                 | 3.40E+03    |
| Y               | 6.08E-06                                       | 1.80E-04 | 1.74E-05              | 3.81E-06 | 1.74E-04                 | 2.86E+03    |
| Zr              | 3.37E-06                                       | 3.38E-05 | 3.27E-06              | 2.03E-06 | 3.05E-05                 | 9.03E+02    |
| Ag              | 1.03E-06                                       | 2.48E-06 | 2.67E-07              | 7.60E-07 | 1.45E-06                 | 1.40E+02    |
| Cs              | 2.66E-07                                       | 9.50E-06 | 9.46E-07              | 1.22E-07 | 9.24E-06                 | 3.47E+03    |
| Nb              | 2.16E-07                                       | 4.88E-06 | 5.35E-07              | 1.56E-07 | 4.67E-06                 | 2.16E+03    |
| Si              | N/A                                            | 6.84E-01 | N/A                   | 5.97E-02 | 6.84E-01                 | N/A         |
| Hf              | N/A                                            | 1.01E-06 | N/A                   | 9.07E-08 | 1.01E-06                 | N/A         |

**Table S4.** Average concentration of the species contributing to the slice denoted as “Rest” in panels (c) and (d) from Figures 7 and 8.

| Figure 7  |                                           |           |                                           | Figure 8  |                                           |           |                                           |
|-----------|-------------------------------------------|-----------|-------------------------------------------|-----------|-------------------------------------------|-----------|-------------------------------------------|
| Panel (c) |                                           | Panel (d) |                                           | Panel (c) |                                           | Panel (d) |                                           |
| Species   | Concentration<br>( $\mu\text{g m}^{-3}$ ) |
| Cd        | 5.83E-03                                  | B         | 5.16E-04                                  | B         | 7.66E-04                                  | Ni        | 5.38E-04                                  |
| Cu        | 2.50E-03                                  | Cd        | 9.38E-05                                  | Zn        | 5.31E-04                                  | B         | 4.07E-04                                  |
| Zn        | 2.12E-03                                  | Zn        | 9.29E-05                                  | Ni        | 1.74E-04                                  | Zn        | 3.81E-04                                  |
| B         | 1.60E-03                                  | Cu        | 5.86E-05                                  | Pb        | 1.53E-04                                  | Ti        | 2.97E-04                                  |
| V         | 1.64E-04                                  | Se        | 2.92E-05                                  | Se        | 1.33E-04                                  | Cr        | 1.95E-04                                  |
| Ni        | 1.42E-04                                  | V         | 2.07E-05                                  | Cr        | 1.31E-04                                  | Cu        | 1.49E-04                                  |
| Se        | 1.19E-04                                  | Ti        | 1.12E-05                                  | Cu        | 1.17E-04                                  | V         | 4.79E-05                                  |
| Cr        | 3.72E-05                                  | Ni        | 1.11E-05                                  | Cd        | 9.56E-05                                  | Rb        | 4.25E-05                                  |
| Ga        | 2.56E-05                                  | Ga        | 9.18E-06                                  | Sn        | 7.25E-05                                  | Pb        | 3.65E-05                                  |
| Ti        | 1.84E-05                                  | Pb        | 4.93E-06                                  | Ti        | 6.08E-05                                  | Cd        | 3.16E-05                                  |
| Pb        | 1.62E-05                                  | Cr        | 4.14E-06                                  | Mo        | 2.23E-05                                  | Mo        | 3.11E-05                                  |
| As        | 1.50E-05                                  | As        | 3.83E-06                                  | Co        | 1.98E-05                                  | Se        | 2.23E-05                                  |
| Sn        | 1.44E-05                                  | Rb        | 3.82E-06                                  | As        | 1.75E-05                                  | Co        | 1.83E-05                                  |
| Co        | 8.41E-06                                  | Co        | 1.17E-06                                  | V         | 1.22E-05                                  | Y         | 1.74E-05                                  |
| Sb        | 8.40E-06                                  | Sb        | 1.15E-06                                  | Rb        | 7.93E-06                                  | As        | 9.83E-06                                  |
| Rb        | 8.40E-06                                  | Mo        | 7.24E-07                                  | Y         | 3.81E-06                                  | Sn        | 9.68E-06                                  |
| Mo        | 7.20E-06                                  | Sn        | 6.75E-07                                  | Zr        | 2.03E-06                                  | Li        | 4.16E-06                                  |
| Zr        | 3.39E-06                                  | Zr        | 6.62E-07                                  | Ag        | 7.60E-07                                  | Zr        | 3.27E-06                                  |
|           |                                           |           |                                           | Nb        | 1.56E-07                                  | Be        | 1.35E-06                                  |
|           |                                           |           |                                           | Cs        | 1.22E-07                                  | Cs        | 9.46E-07                                  |
|           |                                           |           |                                           |           |                                           | Pd        | 6.55E-07                                  |
|           |                                           |           |                                           |           |                                           | Nb        | 5.35E-07                                  |
|           |                                           |           |                                           |           |                                           | Ag        | 2.67E-07                                  |
|           |                                           |           |                                           |           |                                           | Hg        | 1.30E-07                                  |
|           |                                           |           |                                           |           |                                           | Hf        | 9.07E-08                                  |
|           |                                           |           |                                           |           |                                           | Rh        | 1.22E-08                                  |
|           |                                           |           |                                           |           |                                           | Ta        | 7.08E-09                                  |

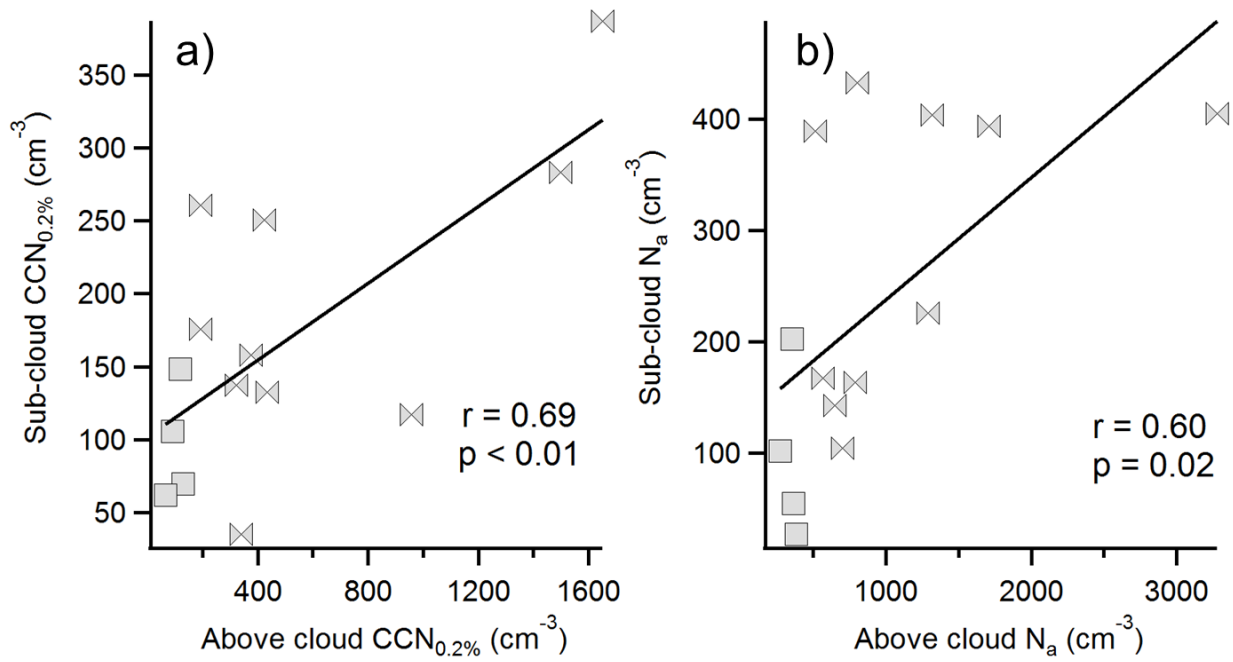

**Figure S1.** The relationship between the average (a)  $CCN_{0.2\%}$  concentration below and above cloud, and (b) the same for average aerosol concentration ( $N_a$ ). Square and bowtie markers are for FASE and NiCE, respectively.

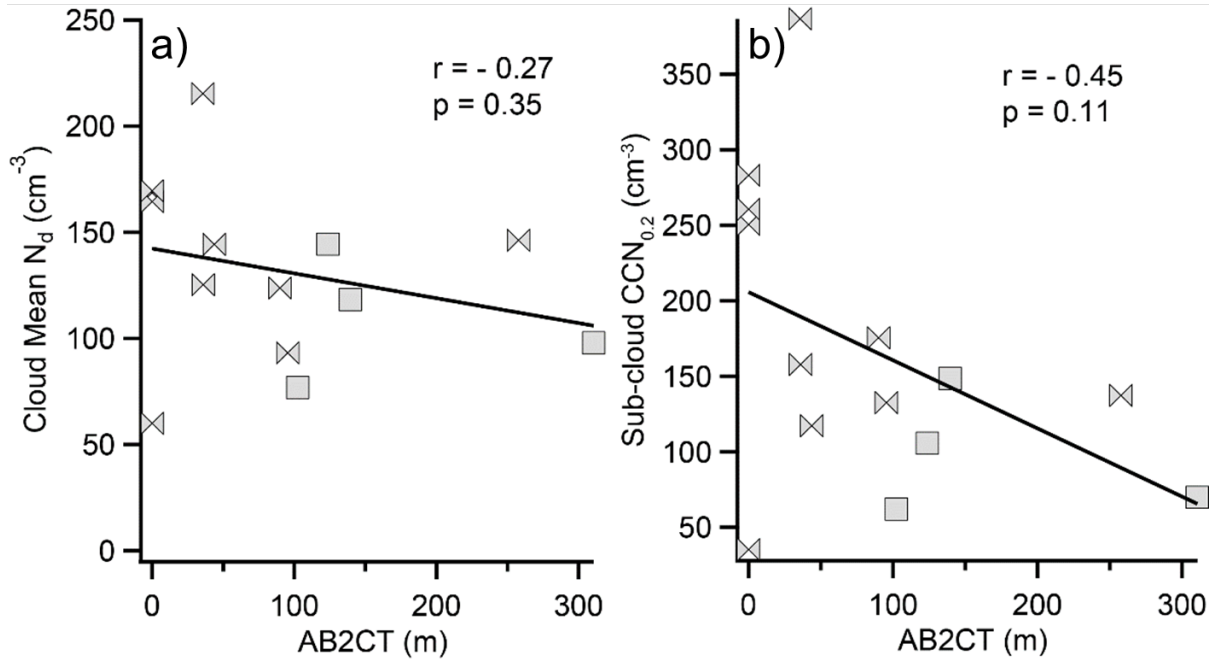

**Figure S2.** (a) The relationship between cloud layer-mean  $N_d$  and the distance between cloud top and the base of a BB layer, commonly referred to as AB2CT (i.e., Rajapakshe et al., 2017). (b) Same as (a) except with sub-cloud  $CCN_{0.2\%}$  on y-axis. Square and bowtie markers are for FASE and NiCE, respectively.



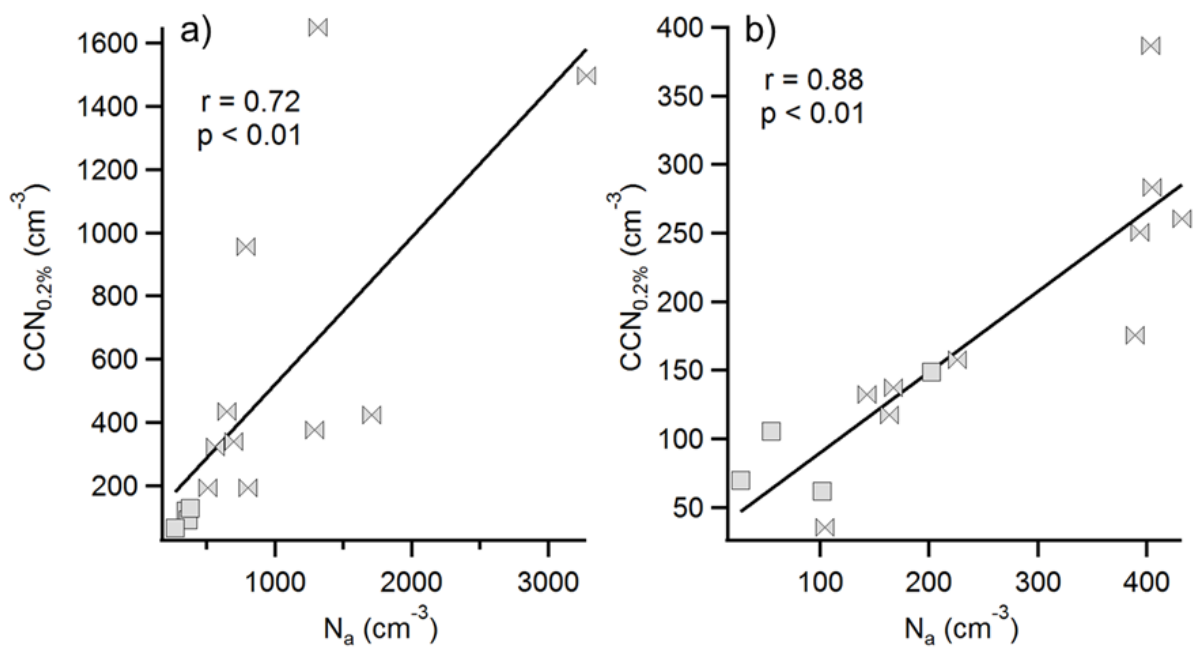

**Figure S3.** Relationship between  $CCN_{0.2\%}$  and  $N_a$  (a) above cloud or (b) below cloud. Square and bowtie markers are for FASE and NiCE, respectively.

## References

Rajapakshe, C., Zhang, Z., Yorks, J. E., Yu, H., Tan, Q., Meyer, K., et al. (2017). Seasonally transported aerosol layers over southeast Atlantic are closer to underlying clouds than previously reported. *Geophysical Research Letters*, 44(11), 5818–5825.  
<https://doi.org/10.1002/2017GL073559>
